## Couple-Centered HIV Prevention and Care: Endorsement, Practice and Uncertainty among US Healthcare Providers in Western-Central Upstate New York

### Authors:

Natalie M. Leblanc, PhD, MPH, BSN<sup>1,7\*</sup>, Sadandaula R. Muheriwa-Matemba, PhD, MScMid, BScNEd, UCM, DipN, RNM<sup>2</sup>, Noelle St. Vil, PhD, MSW, BA<sup>3</sup>, Danielle Alcena-Stiner, PhD, MS, BSN<sup>1,7</sup>, Keosha T. Bond, EdD, MPH, CHES<sup>4,7</sup>, Alexander Glazier, BA<sup>5</sup>, Luis Rosario-McCabe, DNP, RN, CNE, CNL, WHNP-BC<sup>1</sup>, Faith Lambert, FNP-BC<sup>1</sup>, Martez Smith, PhD, LSW<sup>6</sup>

<sup>1</sup> University of Rochester, School of Nursing

<sup>2</sup> University of Illinois, Chicago Human Development Nursing Science Department

<sup>3</sup> University of Buffalo, School of Social Work

<sup>4</sup> City University of New York, School of Medicine Community Health and Social Medicine

<sup>5</sup> University of Rochester Medical Center, Department of Public Health Sciences

<sup>6</sup> Columbia University HIV Center for Clinical and Behavioral Studies

<sup>7</sup> Research Education Institute for Diverse Scholars (REIDS), Center for Interdisciplinary Research on AIDS Yale University School of Public Health

Short title: Endorsement of Couples HIV Prevention and Care Among Healthcare Providers in New York State

\*Corresponding author:

Natalie M. Leblanc, PhD, MPH, BSN<sup>1</sup> [natalie\\_leblanc@urmc.rochester.edu](mailto:natalie_leblanc@urmc.rochester.edu) (NML)

Keywords:

HIV prevention and care, sexually transmitted disease/infections, couples/partners and HIV/STI, HIV/STI health providers, provider-patient, end the HIV epidemic

## Abstract

Given the influence of provider perspective and practice in the uptake of HIV/STI prevention and care strategies, this qualitative description design study sought to illuminate perspectives of couples HIV testing and counseling (CHTC), and describe couple/partner-based practices among health providers in New York State. We utilized a purposive sampling strategy to recruit health providers (N = 27). Semi-structured in-depth interviews were conducted from Sept. 2019 to Feb. 2021. Four themes emerged: perspectives on engaging partners and couples-centered sexual health promotion; providers' experiences with patients and partners in HIV prevention and care; provider endorsement of CHTC; and perceived CHTC implementation determinants. CHTC endorsement was prominently due to the perception of CHTC as a facilitator to enhance patient-provider engagement in HIV/STI treatment and care, especially in the communication and dissemination of information among partners. Providers reported that health literacy needs regarding HIV/STI testing and diagnosis, but primarily STIs treatment regimens warranted a joint approach. CHTC endorsement entailed the strategy's perceived ability to enhance sexual health literacy among patients and patient's partners. Lastly, CHTC endorsements entailed provider beliefs that it ensured knowledge equity and joint literacy in the communication of health information among health consumers. Determinants of CHTC implementation were factors that providers perceived to have a bearing on the facilitation or posed as barriers to jointly engaging partners in HIV/STI prevention and care and was subsequently a source of provider uncertainty. These determinants ranged from provider-level factors to organizational capacity issues that could impact CHTC implementation. Recommendations for CHTC are discussed.

## Introduction

Efforts to end the HIV epidemic (EtHE), must address persistent contributors to ongoing HIV transmission at different levels of influence. Sex-based HIV transmission (penetrative vaginal and anal) dominates the mode of HIV acquisition in the U.S., with 70% of transmission occurring between male same-sex partners, and 22 % were among hetero-sex partners.<sup>1</sup> The Centers for Disease Control and Prevention show that regardless of sex, sexual orientation or gender expression, a quarter of people living with HIV (PLWH) were not diagnosed, another quarter diagnosed did not receive care, and a third were not virally suppressed.<sup>2</sup> Furthermore, regardless of sexual orientation, it is estimated that 40-60% of HIV transmission occurs among intimate partners known to be already living with HIV infection. Epidemiology also shows that of the 23% of U.S. Black and Hispanic persons eligible for pre-exposure prophylaxis for HIV (PrEP), only 9% were actually prescribed.<sup>3</sup> Contextual factors that contribute to persistent transmission, such as structural violence and discrimination, have a long-standing impact on HIV prevention and care and significantly contribute to current health disparities at the systemic and societal levels.<sup>4,5</sup> In addition to contextual factors, interpersonal factors pose as the most persistent and more proximal determinants of ongoing HIV infection and optimal prevention and care.

Interpersonal relationships like those between health providers and health consumers, in tandem with provider characteristics, perspectives and certainty concerning bio-medical interventions, have demonstrated to be critical determinants of health consumers awareness, willingness, and access to HIV interventions. For example, one study<sup>6</sup> found that African-American female adolescents perceived providers as being judgmental and uncomfortable when discussing STIs susceptibility, which resulted in these adolescent girls hesitating to disclose health information in the clinical setting. Leblanc et al. (2019) reported provider perspectives on implementing couples-centered HIV testing and counseling CHTC. They found that providers hesitation was in part due to their colleagues' discomfort in the provision of HIV screening and care, which would subsequently impede any efforts to adopt recommended guidelines to engage people and their partners in joint screening.<sup>7</sup> Another study<sup>8</sup> found that lack of provider comfort in sexual health promotion resulted in low PrEP uptake among men who have sex with men (MSM). Yet

another study<sup>9</sup> further demonstrated that providers in training held racist beliefs that resulted in presumptive withholding of PrEP from Black MSM. These findings demonstrate the role of provider comfort, perspectives, biases, and practice on the potential and actual uptake of HIV and related biomedical interventions. Healthcare providers make clinical judgments about health consumers eligibility for engagement across the HIV prevention and care continuum, however less than half the world's population who are sexually active have ever screened for HIV infection, an intervention crucial for a status-neutral approach and access to the myriad of behavioral and biomedical.

A second dimension of interpersonal relationships that impacts HIV prevention and care, is that between intimate partners. Perceptions on what constitutes a couple may differ between providers and their patients, and this may have implications on how providers engage with health consumers in HIV/STI prevention and care practice. Couples and other self-defined intimate partners need to be considered for intervention and biomedical support, given that ~50% of new HIV infections in the U.S. are partner-based, and in that among those newly diagnosed were with partners known to be living with HIV infection. And that increasing rates of STIs, require a more robust approach beyond existing partner therapy modalities.<sup>10,11</sup> Additionally, the motivation for being in a relationship and to engage in behaviors as intimate partners are known determinants of the uptake of HIV prevention interventions.<sup>12</sup>

Couple's HIV testing and counseling (CHTC) began as an opportunity to facilitate disclosure following HIV screening, and largely implemented in antenatal services outside of the U.S.<sup>13-18</sup> CHTC has evolved as a strategy to address the interpersonal attributes of HIV susceptibility, persistent transmission, and suboptimal engagement in HIV care. This strategy has gathered considerable empirical support for its effectiveness and efficaciousness in reducing the number of sexual partners in tandem with condomless sexual acts, increasing the ease of partner disclosure among those living with HIV, and sustaining linkages to medical care for those who are diagnosed with HIV.<sup>13-18</sup> It is a mechanism that has been shown to optimize biomedical advances like rART, pre- and post-exposure prophylaxis (PrEP, PEP), and various HIV screening modalities (i.e., home-based HIV screening).<sup>19</sup> Furthermore, it has been successful among male same-sex couples in reducing substance use and sex-based HIV susceptibility in U.S. settings, and there is acceptability (albeit no real sustained effort) for such an approach among U.S. heterosexual couples.<sup>20-22</sup> Despite 30+ years of evidence, health consumers and providers globally endorsing this approach, and the existence of U.S. national implementation guidelines, couple-centered approaches to HIV prevention and care remain underutilized in the U.S.<sup>23,24</sup>

Given the critical role of health providers in the uptake of HIV prevention and care strategies, the World Health Organization recommends that ascertainment of healthcare provider perspective on CHTC and practice is imperative to inform intervention development and implementation. The literature on providers' perspectives of couples-based HIV testing and counseling in the U.S. is scant, but ours and other previous work has showcased provider perspectives and willingness to pursue CHTC as a modality to address ongoing community level transmission.<sup>25</sup> Uptake of CHTC and other partner-based services are challenged in part by, Western approaches to medicine, a for-profit driven healthcare system that engages individuals without full consideration for their relationships, and providers not adequately trained or have restrictions imposed on their scope of practice.<sup>26</sup> Additionally, guidance on implementation in the U.S. may be inadequate due to the diversity in sexual activity and subsequent disparity among health consumers who would benefit from these services. Also, health settings may not be well equipped to implement comprehensive and HIV status neutral services, and service reimbursement does not adequately support interpersonal factors associated with health promotion and disease prevention. Therefore, this study builds on seminal work in the Southeast U.S.<sup>7</sup> and seeks to characterize provider perspective on CHTC and experience with engaging partners in WCNY State. Such knowledge is necessary to address a critical gap in evidence-based interventions aimed to enhance provider interactions with couples and patients who are partnered seeking HIV prevention and care services to reduce HIV infections. This knowledge is essential for intervention development, and training healthcare providers to identify and overcome sources of discomfort, and biases in their interactions with people and subsequently couples in need of HIV prevention services and care.

Western/Central New York (WCNY) State is comprised of both a significant rural population and small urban centers. These centers are recovering from deindustrialization with the influx of emerging industries, has one of the highest levels of child poverty in the country, and experiences substantial increases in HIV/STI rates.<sup>27</sup> In New York State (excluding New York City), the context of HIV transmission in WCNY State is seen primarily among an older adolescent/young adult population, in the midst of a significant increase in other STIs including congenital syphilis (even before the COVID pandemic commenced).<sup>28</sup> The area is also experiencing an increase in mortality related to substance use, and a substantial increase in community-level violence including hate crimes, state-sanctioned and civilian murder.<sup>29</sup> Health policy changes in HIV/STI care, like updated local guidelines for expedited partner therapy (EPT), have not been optimized and gross disparities in PrEP prescription showcases that more contextual approaches are warranted in efforts toward ending the HIV epidemic.<sup>30</sup> To that end, given the influence of provider perspective and practice in the uptake of HIV/STI prevention and care strategies, this inquiry seeks to illuminate perspectives of CHTC and describe couple/partner-based practices among health providers who engage in sexual and reproductive health service provision in WCNY State.

## Methods

We approached this inquiry with a qualitative description design. This allowed us to not impose a theoretical framework on provider perspective and practice, and allowed for a direct description of providers perspectives and description of their subjective experiences.<sup>31</sup> Additionally, it's increasingly an approach used in intervention development.<sup>32</sup> Although there is evidence that CHTC is an effective strategy, we approached data collection to include inquiry about recommendations for implementation. This approach allowed for flexibility in decision making as the research process progressed. In alignment with our approach, we utilized purposive sampling to recruit health providers. Employing maximum variation techniques,<sup>32</sup> we recruited providers during grand rounds or meetings with leadership at local health facilities, community forums, via online forums, professional networks, and snowball sampling. Facility based recruitment sought settings in which sexual and reproductive health services are either the main service provided or one of the main services offered. Potential subjects were invited to contact research team members via email and complete a study information form that included additional details about the study, solicited provider demographics and requested them to indicate their willingness to participate in an in-depth interview. This served as their consent to participate in the study. Once subjects indicated their interest and completed the demographic form, indicated their willingness to participate in the study via the information sheet, an interview time was scheduled via zoom.

In-depth interviews were facilitated by a semi-structured topic guide and included open-ended questions about sexual health promotion, HIV/STI prevention and care, and implementation. All interviews were conducted virtually by the lead principal investigator (PI) and two research assistants at a time most convenient to the healthcare provider, to accommodate healthcare provider schedules and the onset of COVID-19 restrictions. Interviews were audiotaped to capture participants insights and allowed a focus on active listening, probing, and maintaining eye contact via zoom, to foster rapport and open in-depth conversation. The data collection and analysis were concurrent processes<sup>33</sup> and data was managed in MAXQDA. Thematic analysis commenced with a review of the interview guide and topics; a review of a subset of transcripts; and ongoing peer debriefings to ensure that the meaning, interpretation, and analytic approach were uniform among the primary analysis team.<sup>34</sup> Analysis involved reading and re-reading transcripts to develop a coding structure that reflected both deductive categorizing of topics identified a priori and inductive emergent thematic patterns in the data, resulting in 4 thematic categories.

## Results

Providers (N = 27) were recruited (September 2019 – February 2021) from Western/Central New York State representing an array of medical providers: registered nurses (RN; N = 2), nurse practitioners (NP; N = 12), physician assistants (PA; N = 4), medical doctors (physicians; N = 7) and a medical assistant (MA; N = 1). Providers were mainly female (N=24), aged 24 to 60 years old, and ranged in practice from 1 to 25 years. Four thematic categories pertaining to healthcare provider perspectives on CHTC and experiences with a partner-centered approach: Perspectives on engaging partners and couples-centered sexual health promotion; Providers' experiences with patients and partners in HIV prevention and care; Provider endorsement of couple-centered HIV testing and counseling (CHTC); and Perceived CHTC implementation determinants.

For the exception of two medical doctors with over 20 years' experience each, no participant had heard of CHTC or the Center for Disease Control and Prevention (CDC) program, Testing Together or any other iteration of this strategy. Before discussing their perspectives on CHTC, providers were asked about their general perspectives on engaging couples or partners in care and sexual health promotion and HIV specifically. Overall, perspectives contained a range of reflections about this approach that were seemingly influenced by actual experiences with considering a patient's partner, engaging couples jointly or reflecting on a hypothetical situation in which a partner-based or couple-centered approach would be warranted.

## **Perspectives on engaging partners and couples-centered sexual health promotion**

Providers were asked about their perspectives on engaging patients and their partners (couples) in sexual health services. Overall providers endorsed engaging couples and utilizing a joint approach based on their own experiences with patients. They endorsed engaging patients and their partners due to what they believed to be the ability to enhance provider-patient communication, a time-efficient approach for communicating key messaging and augment care bidirectionally.

“I just love the idea of bringing people together, and instead of saying it eight times, saying it fewer times, in this case, instead of saying it twice to two separate people, saying it once to them both and then they both get to hear each other's questions and answers...”

Nurse Practitioner, 10 yrs.,  
Women's Health

Providers also perceived partner-based approaches as ensuring that both the patient and their partner understand health information, especially in the context where some information regarding treatment and transmission for certain STIs can be misunderstood. This was perceived as being of added significance in the patient-provider interaction and communication, especially when there are health implications for the partner. Further, providers perceived that jointly engaging partners would not only ensure health information is accurately disseminated to the partner of their patients and presumably jointly understood, but was perceived to be a way to discuss complicated health issues. Providers noted that such communication about difficult issues may sometimes warrant both partners to be engaged in a health visit to ensure that a particular health intervention is accurately considered and to facilitate uptake.

“I can see the benefits of seeing couples together, especially for something like PrEP...I can see how it can be helpful, and maybe even enhance compliance with taking medicine some things like that if partners are involved in their care as well.”

“I try really hard to invite partners into the room for any kind of visit that people feel comfortable having...I think it's important to make space for people to have private

conversations and...to have support people there with them to help them remember recommendations and talk about things in a way that helps it cement in their head...it's a really frequent thing that I'm saying I wish that I have a partner here in the room with them to navigate this conversation..."

Physician, 9 yrs., Ob/GYN

## **Providers' experiences with patients and partners in HIV prevention and care**

Several providers reported experiences whereby they either engaged individuals in HIV prevention and care which included a focused conversation regarding partners (partner-based); or a more explicit engagement with both partners in the same space and time (couple-centered). In a partner-based approach, providers reported on conversations and practice that revolved around patient education about HIV/STI treatment, transmission and partner implications. Providers described a more couple-centered approach focused on actively engaging both sex partners or couples in joint conversations or their practice to address the presence of or susceptibility to HIV or STI acquisition.

Partner-based engagement consisted of provider communication with patients about partners. Providers described that some health assessment information had to be obtained through one-on-one conversations since there were issues that would possibly not be addressed with both partners. These conversation with patients however considers the role of partners, like intimate partner violence, asking about non-monogamous relationships or the involvement of people not included in the main partnership.

"...it's very important to have that one on one interaction without a partner there, for doing things like you know asking about other exposures, outside of that relationship and safety in sexual relationships and intimate partner violence, things like that, that you can't ask in front someone else...and I am not infrequently in the position of having conversations with couples together, where either I or one of my [practice] partners is the doctor for both members...one partner of the couple is my patient, and the other one doesn't have a physician"

Physician, 9 yrs., family medicine

Providers reported experiences with patients regarding recurrent diagnoses of sexually transmitted infections or conversations to facilitate partner disclosure to partners and partner treatment. Providers were also responsive to an index patients request for assistance in communicating with their partner about their STI.

"...herpes and then also with genital warts, these are the ones where it often comes where I will have a conversation... sometimes I will invite the partner to come in the exam room... I've done that also on the phone... that will be for patients who...don't know how to talk to their partner or their partner has a ton of questions... I think it just helps the patient...they don't remember everything I am saying, so it helps them to answer questions, or understand the ongoing ramifications..."

Nurse Practitioner, 10 yrs.,  
Women's Health.

In the context of a new STI diagnosis, providers engaged patients in conversation to facilitate engagement in care, treatment, disclosure, and partner screening. A partner-based approach also included education to

help patients understand the transmission and treatment of certain STIs over others (HIV and herpes versus Chlamydia and Gonorrhea) and the implications for partner-based transmission.

“Honestly, the worst diagnosis to tell anyone about is herpes...people cry, people think their lives are over....herpes has like the worst stigma of any STI and I also think it’s not well understood .... I think people have this idea...they won’t be able to sex with anyone again...it may be just misunderstandings about herpes...and just the idea of like, ‘how am I gonna tell my partner?’ ‘And when did I get this?’

Nurse Practitioner, 10 yrs., Women’s Health

At other times, partner-based engagement included providers whose communication was with patients whose greatest concern was maintaining the integrity of their intimate relationship. Relatedly, providers also reported engaging with patients who utilized HIV screening as an opportunity to facilitate disclosure of their known HIV serostatus to a partner. This approach may include facilitating partner screening for HIV, in which the interaction between the patient and provider may morph into a more couple-centered approach whereby a patient and partner are seen jointly.

“...we have somebody who is truly newly diagnosed [with HIV] who is devastated and has the fears of rejection and “How am I going to tell my partner?” and all of this. Then you have the person who is a known positive, who’s been afraid to tell their partner. And we work with that person to try to find a way and sometimes those people will come in and have a test, even though they’re a known positive, and claim it to be a new diagnosis so that they can inform their partner that they have HIV.”

Nurse-Registered Nurse, 6 yrs., sexual/reproductive health

Couples engagement was also perceived to be a way to get a sense of a patient’s support system and better contextualize their interpersonal lives. This insight influences the provider-patient relationship and subsequent care for the patient.

“...people are already going to each other’s visits and it’s great... it augments health care if there’s 2 people...I’ve almost always found it helpful when a partner is there to give us a little bit more information...like last week this postpartum lady had depression ... her husband knew a lot more detail ....it gave me an idea of what type of support she had at home... I was talking to both of them equally about what they can do to help each other and especially during this time that was really challenging.”

Nurse-Midwife, 8 yrs., sexual/reproductive health

## **Provider endorsement of couple-centered HIV testing and counseling (CHTC)**

### **Endorsement of CHTC**

Overall, providers endorsed CHTC as a viable strategy and described their willingness to implement CHTC. However, some providers also expressed uncertainty alongside their endorsement.

*CHTC Endorsement.* Though the overwhelming majority of providers had no previous knowledge or had even heard of CHTC, many endorsed the strategy and generally perceived its implementation as feasible in their health settings. Provider endorsement is characterized as having support for a couple-centered approach broadly and CHTC specifically while citing fundamental concerns and possessing limited reservations about its implementation. The most positive endorsements of CHTC cited that it ensured knowledge equity and joint literacy in the communication of health information among health consumers. Endorsement was primarily informed by experiences with patients.

“...it [CHTC] would be really helpful, because.....it’s a lot to take in a visit... we’re treating them here today and they need to abstain from intercourse for a week. And then they go and for whatever reason they only absorb that they need to abstain from intercourse for 3 days...even though they were treated, now their partner has it or they’re re-infected...it would be nice if they were involved in the same conversation...sometimes it’s nice to hear it together.”

Nurse Practitioner, 6 yrs.  
Women’s Health

Endorsement was also informed in some cases, as reflected below, provider frustration with persistent HIV and other STI transmission.

“it’s critical...what we really need to do is facilitate people sharing their results...I’m so tired of treating people for the same thing over and over again...it’s like the message is not getting communicated to both of them ...I’ve heard patients like ‘oh he told me it’s a UTI’ and it’ll be gonorrhea ...this is not sustainable, we need to get you treated or you need to stay away from this person... I think having people to coach HIV testing together, would actually facilitate that sharing of results a little bit and maybe even strengthen their interpersonal relationships so that they can talk about those things and other things, so I would love that (CHTC) that sounds great.”

Nurse-Midwife, 9 yrs.

They further reported that CHTC would allow partners to advance discussions about their sexual health more broadly. CHTC could also facilitate conversations between partners that otherwise would not happen.

“.... if it’s done the right way, approached at the right way, then do it [CHTC]. Because people in relationships, I mean there is some relevance....and I realize there are traps here, but in some settings and in some situations two people who hear the same information at the same time from the same person provides an opportunity to have some discussion and ...learn something.

Physician, >20 yrs., ID medicine

*CHTC Uncertain Endorsement.* Some providers generally endorsed CHTC, but expressed some uncertainty based on their experience with patients and their partners, and the perceived nature of partners and relationships. Other sources of uncertainty were based on knowledge of their patient population and questioning whether there would be a demand for CHTC.

“I see a fair number of couples, even the couples that self-identify as couples have a fair amount of distrust of one another, and I don’t think that it would be a reason not to offer it, but I do wonder how many people would be willing to take that strategy, knowing that it requires mutual disclosure.”



Physician, 9 yrs., Family Medicine

Other providers who endorsed CHTC were also attentive to relationship dynamics and other relationship attributes as part of an overall assessment of the couples' health and well-being. Some of the uncertainty in these cases were based on known HIV stigma that may impact relationship integrity and the type of couple who would or should engage in CHTC.

...this could be a great strategy for a good relationship...if it's a casual relationship ... I may have a bias...it makes sense intellectually, it makes perfect sense, but I feel my bias... if I'm in a new relationship, and I find out that this person I'm with has HIV, am I going to want to continue in this relationship?...I want to enter a relationship with someone knowing they are HIV positive, I wouldn't, which is terrible for me to say, because that's not how I counsel patients."

Nurse Practitioner, >10 yrs., Women's Health

Sources of provider CHTC uncertainty was also demonstrated in considerations for implementation. Providers speculated that some information about the couple's relationships and/or individual partner behaviors might not be revealed in joint sessions or health visits. Therefore, separate sessions would elicit information that would otherwise not be shared due to discomfort or lack of transparency between partners. Providers perceived the omission of certain information would give insight into the relationship dynamics, health needs, or HIV susceptibility within the couple.

"I feel like you could do it [CHTC] as long as you still had a component when you separate them [and] talk to them separately. Because if there are other partners involved or other like sexual behaviors involved that they're not comfortable sharing... they might be less willing to express that. So, you might get a sort of skewed risk assessment...it all depends on the status of the relationship. But it sounds like a good idea."

Physician, 2 years, ID Medicine

## CHTC Implementation Determinants

Determinants of CHTC implementation were factors that providers perceived to have a bearing on the facilitation or posed as barriers to jointly engaging partners in HIV screening. These determinants ranged from provider-level factors to organizational capacity issues that could impact CHTC implementation.

***Provider willingness to implement CHTC.*** Despite not having previous knowledge about CHTC, most providers reported they were willing to implement CHTC. Their willingness appeared motivated by desiring to address the HIV prevention needs of the patient population served and having partner engagement experiences. Willingness was partly based on exposure to and their own experiences of considering partners in their practice or engaging in a partner-based or couple-centered modality. Other providers simply believed that a joint patient and partner consultation allowed an opportunity for discussion of health topics in the presence of a health practitioner. The practitioner represented a third party and was perceived to be a buffer in any conflict between partners outside the clinical setting.

"I'm very willing to do whatever it takes to get people the right information, because sometimes you have- two people get a visit and you tell both of them the same thing and they both can interpret it differently and then they go home together and then they're still

blaming each other...whatever it takes to get the right information to them...engaged in whatever care it is that they need, I'm willing to be flexible to do that."

Nurse Practitioner, 10 years,  
Women's Health

Some providers were willing to implement CHTC because they perceived it to be more efficient in providing patient education. Their willingness appeared grounded in a general desire to provide patients with the best care possible, which involved educating them in a way that was salient for the couple's joint understanding and addressed follow-up to patients in real-time. However, joint HIV testing must be contingent on couples' willingness to engage. Essentially, if the couple was willing, so was the provider.

"I definitely think it's better if you can jointly test them and if they're willing to disclose to each other ... that's so much easier than...testing them separately...sometimes I'll be seeing a husband and a wife for ...their annual visits, and they want to be seen together ... so that would kind of be an extra visit...some people are very open to doing that with each other... I don't have any problems with it."

Physician, <5 yrs., Women's Health

Some providers were willing to implement CHTC in their practice and gave insights for doing so. They preferred individual consultations with either partner first, prior to a joint session with both partners to assess the relationship. The prominent reason was to address individual health needs and ascertain a more complete context of the couple's relationship.

"...when two couples are together, they don't say things or they hide things from each other, so I would like to first individually approach it, and then potentially putting them together and see how the dynamic is between those two and see how receptive they are or how involved they are in the care, but I like, I like the idea of having two of them, both couples together..."

Nurse Practitioner, >10 yrs.,  
Family Medicine

"...there's lots of patients that do have a partner, an on again off again partner or a long-term partner and it would great to have them be together there. I think how many times a day do you do the same counseling on an individual patient that could've then been done it for two people together. I love the idea to walk into the room and say "Okay so you're both here for testing together, that's so great."

Nurse Practitioner, 10 yrs., Women's  
Health

Providers who reported some experience with partners, though endorsed CHTC, appeared to want to maintain some aspects of their current practices to facilitate CHTC implementation. This appeared due to existing protocols that engage partners in a non-threatening way that supports the provider practice.

"...because [of] our protocol we do just kind of start alone at first, just to make them comfortable ...there can be a barrier whether they're just really embarrassed or not a hundred percent confident in telling their partner "hey no I want to ask these questions or be counseled by myself" and we find that sometimes they'll be a little more truthful and open in that type of setting..."

Medical Assistant, <5 yrs.,  
Sexual/Reproductive Services

Ultimately, provider willingness among participants provided insight into considerations regarding CHTC implementation. As the previous exemplars note, starting a health visit with partners individually was perceived to give a provider better insight into the relationship dynamics and HIV susceptibility. Following individual patient engagement, a joint session would give greater context to the couple's need and ability to receive information that is salient for them.

***Provider capacity to implement CHTC.*** Provider perspectives on provider capacity to implement CHTC reflected primarily logistical and couple/partner-level factors that served as either facilitators or challenges to the uptake of CHTC. For example, one provider noted that it was simply more convenient for them to test separately and not engage with both partners simultaneously, due to time constraints and scheduling.

“I probably would have just ordered the HIV antibody and had them just go to the lab and have it drawn.... kind of thing because it's just easier. It's really hard to be able to bring somebody in and sit them for counseling. Just because we as providers don't have a lot of time to do that and there's you know it's hard to just bring somebody in.”

Physician Assistant, 6 yrs.,  
Generalist

Other providers demonstrated capacity by referencing previous experiences with couples in general, not just regarding sexual health or HIV counseling. They also reported being compelled to engage partners due to the couple's health situation, their experience with patient engagement and information retentions, or at the request of one or both partners.

“... so I actually tried to work with couples here. I had spoken to our previous boss that was here about doing couples' work, and if there was a situation where we had a patient here that had a partner, they might be on-site or maybe not, I'd invite them to invite the partner in because there are a lot of things that they felt like they couldn't comfortably discuss with the partner or they felt the partner would get angry, and I felt like I could mediate that and work with them together...”

Nurse-Registered Nurse, 2 yrs.,  
Sexual/Reproductive Services

For some providers, capacity was not concerned with or questioned whether they could implement CHTC, but with contemplation of what the strategy could look like in their setting and considerations that would need to be made in their personal space.

“...if I were going to implement something like that...how do I protect [the patient]... how do I make sure I'm testing them each for the right tests...and protecting their confidentiality or like for female bodied patients...I'm often promoting “Do you want any birth control, is there anything else you need? Do you need a pap?”... those are some of things I would be thinking about... Do we separate patients to chat about that?”

Nurse Practitioner, 10 yrs., Women's  
Health

“...physicians are bombarded with a lot of information and it’s hard to remember in the moment, all of the tools...the biggest challenge is having it [CHTC] be as a resource top of mind for clinicians, particularly clinicians who aren’t seeing people with HIV every single day... It’s just always so many different competing priorities, ...how do you integrate something in such a way that it doesn’t seem to other people to be just one more thing?...”

Physician, >10 yrs., Family Medicine

Providers felt competent in their ability to facilitate CHTC implementation, even in specialized settings. Providers in these cases reconciled that for CHTC facilitation and implementation to be possible, the health setting they operated within had to make some accommodations change.

“...we need more time, we’d need a space that’s just for doing that... I’d have to talk to them about billing for male partners which I have a license to do so that would be within my scope of practice.”

Nurse-Midwife, 9 yrs.  
Women’s Health

**Health facility preparedness to implement CHTC.** The sample of providers were employed in a diverse set of healthcare environments. The majority worked within federally qualified health settings that provided primary health care and served people living with HIV. A lesser number of providers worked within specialized clinics that were couched in university-based or privatized health settings. Some providers worked in up to 2 settings. However, most reported that they were willing to implement CHTC and that their health facility could be willing to facilitate. Several factors were deemed to impact facility preparedness to implement CHTC and ranged from practice logistics to protocol development and community engagement.

“No, so we don’t allow patients... in the same exam room...like a couple comes into the clinic together and they’re brought to their own exam rooms, their intake is done separately, I see one separately and then go and see the other...obviously I’m not talking about one with the other or anything like that. So they’re treated like separate patients completely even though they came in together and know each other is there...I basically pretend like I don’t know they’re a couple.

Nurse Practitioner, 6 yrs., Women’s Health

Providers who worked exclusively in specified settings whereby a couple-based approach may not be feasible unless the facility greatly expanded its patient focus to service all types of couples (i.e., women’s health clinic), in which some providers were still willing to consider:

“...There’s some logistics that we would have to set up so that we could do that but I think that it’s totally possible.....the typical American model is one patient at a time and billing for one patient at a time... so I think we just need to make sure we have the codes for that and that that’s going to work because right now we don’t have any male patients”

Nurse-Midwife, 9 yrs.

**Logistic considerations for CHTC implementation.** Providers reported and seemed to believe that their practice environment could make adjustments to implement CHTC. Agency preparedness to implement CHTC entailed providing capability and comfort to facilitate CHTC, address the need of diverse patient populations, and the provision of basic HIV screening services.

“I think the majority of people have gotten more comfortable with sexual health...I think you need that. I think you need that level of comfort with sexual health. The second thing you need is point-of-care testing. ...I think the ideal delivery is in person, and if you want to do it in person, you want to ensure it to the other person.”

Physician, 9 yrs., Family Medicine

Provider beliefs in the capability of their health facility to implement CHTC was in part contingent on whether there was a need for their facility to adjust existing clinic protocols or logistical shifts to facilitate implementation. Some of the practice adjustments were perceived to be more about patient flow and front-staff preparations.

"...appointment scheduling, I know it sounds like not a big deal, but it always ends up being a bigger deal and then communicating with the folks who make the appointments on the phone...online appointment scheduling as well, so just kind of figuring out what would that look like, would they be able to add that into their system...in terms of the actual education for staff to actually know what to say and do in the room ... that the couple's confidentiality is being maintained.”

Nurse Practitioner, 10 yrs., Women's Health

“I would just need front staff to schedule me time to do it.... and give myself a little bit more time so I could answer any of their questions. I probably would send a message to my care manager and have her reach out to the patient and their partner...I would probably have them come in and be counseled, either by our RN care manager or by myself.”

Physician Assistant, 6 yrs., generalist

Another element of logistic considerations was related to billing and reimbursement for CHTC services. This consideration was a touchpoint for providers, particularly those who may not have had experience with partners, but also for providers who worked in setting where public federal dollars support the services they provide.

“...if we had a system that's set up for it and a way to bill for it [CHTC] so I think adding in stuff that's really hard in the system in the one that I currently work in without a really good reimbursement or like a reason to do it basically, a branch reimbursement or you know a setting that makes it easy for us to do.”

Nurse-Midwife, 9 yrs.

Billing was also an important consideration for specialized settings, like women's health, by which a partner who was male at birth could not be seen due to perceived jurisdictional mandates.

“...for our practice it would be billing...this is assuming the partner in this instance is male. So billing is going to be a huge barrier for us trying to work through that...we are not family, it's a women's health practice, we should not be providing sexual health to cisgender men...”

Nurse Practitioner, 10 yrs., Women's Health

“...when people come into our healthcare setting, they have to register and they have to have their insurance verified, and there is so much bureaucracy...developing a registration process where the couple can register as a couple for a visit, instead of two separate visits... being able to register together would make it much more realistic to then bring that couple in to see a nurse or clinician together...”

Physician, <10 yrs., Family Medicine

Provider and staff shortages were reported as another determinant of agency preparedness for CHTC implementation because it currently impacted care for some facilities. One provider spoke to their willingness to provide CHTC but proposed that a team-based effort and a patient engagement script for providers may best prepare a facility for CHTC implementation.

“...I can do it, but I’d still like some help...I don’t do the rapid test, I do the preliminary piece and the dispensing advice ... so the tester person also needs to be prepared...I’m okay with parts of it [CHTC] being scripted or being scripted for some people.”

Physician, 20 yrs., ID Medicine

Providers noted that these staff shortages, in tandem with patient load, may disallow CHTC implementation. Another provider reported that their health facility is overwhelmed, such that this would stifle CHTC implementation due to the perceived inability to make any protocol changes and address the needs of the couple.

“...we’re so full with what we have now, we don’t have enough providers...I’m not against it...I’m not sure people have time, but if they had somebody who specializes in infectious disease, felt comfortable, and they had that person who was willing to do that, I think they [facility leadership] would welcome that. I just don’t know that we have that right now.”

Nurse Practitioner, 10 yrs.,  
Women’s Psych Health

*Community engagement and meeting patient needs.* Provider endorsement of their health facility was also contingent on the existing patronage from the community, and the resources they currently can provide.

“...how can we get the word out to the community...just knowing that this is something that we are bringing to the forefront within the community...I think that will put us ahead of the game...we do have the HepC clinic, the HIV clinic and those are heavily advertised in the community...this would be you know just another great idea that it’s being implemented...”

Physician Assistant, 3 years, Generalist

Another aspect of facility preparedness for CHTC was not only the ability to screen a couple jointly, but actively refer patients to meet patients’ needs, specifically in those settings that do not provide HIV care. Providers reported already having a facility-based protocol in place to refer those newly diagnosed to HIV care.

“If they do test positive for HIV, we always give results in person. We just make that a practice. And then we obviously want to follow the guidelines...not just sending the patient off to kind of figure out what’s next...specifically calling an HIV care clinic that can offer that patient care right with the patient in the room, setting up the appointments, getting them engaged...”

Nurse Practitioner, <10 yrs., Women’s Health

## Discussion

Research and implementation studies have determined that CHTC is an effective strategy to engage people not aware of their HIV status and those who are in HIV serodifferent relationships. Couple centered approaches to HIV were also fundamental to demonstrating the efficacy of HIV biomedical interventions. Study findings here revealed that the current sample of health care providers overall endorsed CHTC as an HIV testing and care engagement modality. Other studies have found the same, for example in the U.S., formative work has found that both health consumers and health providers, support active couple-based modalities for HIV/STI prevention and care<sup>15,35</sup> as a way for mitigating transmission. Leblanc et al. (2019) found that among 22 U.S. health providers endorsed CHTC and thought that it made sense when attempting to mitigate HIV transmission between partners and within communities. In the South Florida based sample, providers were overall willing to engage in CHTC implementation, and as in the current sample, had some experience engaging couples/partners in STI screening and care and sexual health more broadly. These experiences and practices were motivated by provider’s motivation to meet patient needs to facilitate STI disclosure and partner treatment.<sup>7,25</sup> Participants in the current study also reported a willingness to facilitate CHTC and were comfortable conceptualizing the strategy at their place of practice with some considerations. The salience of CHTC was attributable to providers practical experiences with engaging patients seeking HIV, but primarily STI services, whereby they felt compelled to engage patients and consider their patient’s partners. No provider reported engaging couples as routine practice for HIV or STI prevention and care. However most reported being adaptive in their practice to engage partners together either when requested by the patient to facilitate education or when there was perceived benefit to include the partner of patients in the diagnosis and treatment of STIs. Despite this practice no one in the current sample mentioned or spoke to existing guidelines like CHTC or even partner notification and expedited partner therapy to help mitigate STI transmission and address community-level persistence of HIV and other STIs.

Provider endorsement of CHTC seemed largely due to the strategy being perceived as a facilitator to enhance patient-provider engagement in HIV and other STI treatment and care, especially in the communication and dissemination of information among partners.<sup>36</sup> One of the most prominent features of provider CHTC endorsement is the strategy’s ability to enhance sexual health literacy among patients and patient’s partners. Providers reported that health literacy needs regarding HIV/STI testing and diagnosis, but primarily treatment regimens for STIs that have bearing on the health of both partners, warranted at times a joint approach. Providers also shared that CHTC may also attend to provider burden by not engaging in time-consuming, repetitive health education to mitigate HIV/STI transmission between partners. An approach like CHTC which encourages jointly engaging partners in HIV/STI screening and care, can ensure that the STI and sexual health practices are patient-centered and tailored to the behaviors and specific health needs of patients and their partners. Providers with experience meeting couples/partners noted the benefit of receiving and giving health information and how this may enhance care. Research has shown that patient health literacy in HIV and other STI care has a bearing on the uptake of appropriate interventions and may be one of the most important elements contributing to persistent HIV/STI transmission.<sup>37</sup> Research has also demonstrated that health literacy, in tandem with patient-provider communication and trust, has a bearing on the uptake of prevention and engagement in

treatment strategies.<sup>33,38,39</sup> Therefore, provider practice that can enhance health literacy and that is built on trust between partners and with providers warrant routinization in sexual health promotion practice. Studies have demonstrated the role of provider communication in promoting health literacy along HIV Care Continuum. One study, found that trust with providers was facilitated via provider communication which had bearing on the retention in care among Black women living with HIV infection.<sup>40</sup> However, adequate patient education can be perceived as time-consuming and challenged by competing priorities, and health systems that disallow robust patient engagement.<sup>41</sup> Given the importance of this feature in the context of STIs care, patient engagement modalities that can ease, expedite and assist in patient education and treatment, like CHTC, warrant consideration and uptake.<sup>42,43</sup>

Provider uncertainty in an endorsement of CHTC was based on provider's experiences with patient populations that have an exceptional susceptibility to HIV and other STIs. Historically provider uncertainty in the HIV prevention/STI care context was more to do with understanding and adopting HIV medication regimens for people living with HIV and provider competencies.<sup>44</sup> Current evidence of provider uncertainty has been shown in the inadequate provision of PrEP for key populations, related to provider attributes regarding their endorsement of certain key concepts like U=U, and the efficacy of PrEP. (1) Another uncertainty is evident in suboptimal uptake and provision of HPV vaccination in the U.S. and globally. One systematic review found that health providers' perspectives on HPV and HPV vaccination impeded uptake, and that personal biases may play a role.<sup>45</sup> In addition to provider perceived competence, providers' uncertainty in the current study was related to the perceived inability to address potential couple discord in a joint health session and lack of transparency of partners' behaviors which impacts health education and appropriate care. Some of this uncertainty was based on concerns of relationship violence and appeared to influence how some providers spoke about their facility's preparedness and hypothetical implementation of CHTC. Though, research has shown that CHTC does not increase intimate partner violence in couples.<sup>46</sup> Provider uncertainty also involved whether communities would find CHTC an attractive strategy. Relationship discord and various dimensions of IPV between partners is a feature in STI transmission and recurrent infection.<sup>47</sup> However, research with couples have demonstrated even when this feature is present, couples/partners will engage in joint approaches to mitigate transmission.<sup>47</sup> Given this context, provider uncertainty in this regard would need to be addressed by ensuring that any provider training includes IPV screening and referral protocols for resources for couples to access. Research has demonstrated that when such guidelines are present within health facilities providers are motivated to engage in certain interventions resulting in improved patient outcomes. To address this and other causes for provider uncertainty, previous work on provider perception of CHTC, included a recommendation that a team-based approach is utilized to address issues like potential IPV and to leverage the skills and expertise of an interdisciplinary team in the clinical space.<sup>7</sup> Although no provider mentioned a team-based approach to implementation or current practices in their facility, such approaches may be worth curating in certain settings in Western-Central New York State.

Some established barriers to couples-based approaches include, power dynamics within relationships, and HIV stigma.<sup>48,49</sup> As one provider noted, although they fully endorsed the strategy and would promote it for their patients, due to HIV stigma, they questioned partners commitment in the context of a new HIV diagnosis. HIV stigma has been demonstrated to be one of the primary determinants of HIV prevention and care efforts.<sup>50</sup> However research demonstrates that with adequate health literacy regarding antiretrovirals for prevention and treatment, partners who want to remain committed do.<sup>51</sup> It is also at these encounters whereby messaging regarding Undetectable=Untransmittable (U=U) and PrEP becomes crucial for patient and partners understanding and literacy about HIV/STI transmission, ART uptake, and maintenance of relationships should this be a goal.<sup>52</sup> However this requires that providers are aware and comfortable with the concept of one, serodiscordance, then U=U and lastly the efficacy and diversity of PrEP relevancy for couples. Research demonstrates that there remains provider uncertainty in all these areas indicating research needs and intervention for this group of providers.<sup>44,52,53</sup>



Lastly, provider uncertainty was related to provider perspectives of their facility's willingness and preparedness to implement CHTC, and whether institutional support and flexibility in existing protocols can allow for CHTC implementation. This flexibility and support pertained to the ability to see partners together and support staff facilitating some of the patient registration, scheduling processes, and testing. It was perceived that CHTC could eliminate multiple visits by a patient and their partner if they could be seen together. This could alleviate known issues with provider shortages and patient wait times for an appointment. Providers also noted billing of joint services being a concern and contemplated how services could be rendered with the current healthcare reimbursement structure. Seminal work conducted in South Florida revealed that providers believed CHTC to be a viable intervention, but also noted billing for CHTC and other partner services was also a concern and posed a barrier to CHTC implementation.<sup>15</sup>

Akin to CHTC, partner notification and expedited partner therapy are strategies intended to New York State partner notification is an opportunity to implement certain components of CHTC in that disclosure and partner treatment are program goals. Partner notification guidelines for certain STIs give direction to mitigating transmission and ensuring adequate treatment for partners of patients. However national guidelines and subsequent practice are underutilized. Expedited partner therapy (EPT) which like CHTC has demonstrated efficaciousness in reducing recurrent STIs. It is partner treatment specific modality to chlamydia and gonorrhea and not of other STIs which may hold greater stigma, like herpes,<sup>11</sup> and hence warrant greater provider involvement as mentioned by participants in this study. Research has demonstrated that challenges to EPT utilization are multi-level and systematic, but that healthcare provider comfort and uncertainty plays an integral role in implementation. In the current study, providers with couple/partner-based experiences to address STI diagnoses and treatment, and those without but who endorsed the approach demonstrated a level of comfort to engage patients and their partners jointly either in-person or remotely. They also demonstrated awareness of the importance of meeting patients' needs and CHTC may be a modality that does. The underutilization of existing national CHTC and EPT guidelines to address interpersonal attributes of HIV/STI transmission, in tandem with, provider uncertainty speaks to a need for enhanced provider training. Provider training would comprise that as offered within education curriculums and as continuing education opportunities, which would address provider uncertainty in management of sexually transmitted disease prevention, specifically within couples.

## Conclusion

This study contributes to efforts to end the HIV epidemic (EtHE), specifically provider endorsement and perceived considerations for CHTC implementation. Health providers are central to the uptake of HIV/STI interventions hence, it is critical to understand their perspectives and perceived determinants for implementation. This study reported on the perspectives and practices of health providers in Western/Central New York State. Health providers reported on their experiences with engaging patients and considering partners in sexual health promotion including STI care. Couple-centered approaches, CHTC, expands health to be inclusive beyond the individual and has holistic interpersonal features which mitigates HIV/STI transmission, and further benefits in the uptake of biomedical treatment and prevention. Provider perspectives were cemented in their experience with engaging their couples susceptible to and seeking treatment for STIs including HIV. These perspectives are particularly important to improve HIV counseling and treatment, address HIV stigma and confront the rise in STIs. Findings from this current study indicate that providers have patient engagement experiences that involve patient's intimate partners in clinical practice. Such engagement or prospective engagement influenced their endorsement of CHTC as an approach that addresses stigma, health literacy, and interpersonal communication regarding HIV and other STIs. CHTC was perceived as a way of addressing not only HIV transmission but mainly other STIs, which have dramatically increased in Western New York, and enhancing patient-provider engagement to facilitate health literacy pertaining to STIs and sexual health more broadly.

As efforts to end the HIV epidemic intensify, and jurisdictions across New York State experience substantial increases in bacterial and viral STIs, interventions to enhance HIV/STI screening and expedited treatment require greater consideration and implementation. CHTC is such a strategy that embodies U=U as a way to normalize HIV prevention and care, has demonstrated efficacy in optimizing the HIV status-neutral continuum.<sup>13,54</sup> The HIV status-neutral continuum is a reframing that centers on HIV screening and highlights the importance of antiviral therapies in HIV prevention and care. Future research and efforts should address provider uncertainty with U=U and subsequent CHTC. As well as facilitate HIV/STI partner-based interventions, and provider perceived facility level implementation needs for CHTC. Lastly, future health service research and healthcare practice should address CHTC determinants.

## References

1. Centers for Disease Control and Prevention. HIV Surveillance Report: Diagnoses of HIV Infection in the United States and Dependent Areas, 2018. 2019.
2. Centers for Disease Control and Preventino. Diagnoses of HIV Infection in the United States and Dependent Areas, 2021. HIV Surveillance Report. CDC; 2022.
3. Centers for Disease Control and Prevention. HIV and African American People: PrEP Coverage. 2023.
4. Farmer PE, Nizeye B, Stulac S, et al. Structural Violence and Clinical Medicine. *PLoS Med* 2006;3(10):e449; doi: 10.1371/journal.pmed.0030449.
5. Godley BA, Adimora AA. Syndemic theory, structural violence and HIV among African-Americans. *Curr Opin HIV AIDS* 2020; Publish Ahead of Print; doi: 10.1097/COH.0000000000000634.
6. Córdova D, Lua FM, Ovadje L, et al. Adolescent Experiences of Clinician–Patient HIV/STI Communication in Primary Care. *Health Commun* 2018;33(9):1177–1183; doi: 10.1080/10410236.2017.1339379.
7. Leblanc NM, McMahon J. Perceived Facilitators and Barriers to Couples’ HIV Testing and Counseling in U.S. Clinical Settings: Perspectives From U.S. Health Providers. *J Assoc Nurses AIDS Care* 2019;30(3):279–291; doi: 10.1097/JNC.0000000000000055.
8. Valente PK, Mimiaga MJ, Chan PA, et al. Health Service- and Provider-Level Factors Influencing Engagement in HIV Pre-Exposure Prophylaxis Care Among Male Sex Workers. *AIDS Patient Care STDs* 2021;35(8):279–287; doi: 10.1089/apc.2021.0084.
9. Calabrese SK, Rao S, Eldahan AI, et al. “Let’s Be a Person to Person and Have a Genuine Conversation”: Comparing Perspectives on PrEP and Sexual Health Communication Between Black Sexual Minority Men and Healthcare Providers. *Arch Sex Behav* 2022;51(5):2583–2601; doi: 10.1007/s10508-021-02213-3.
10. Jamison CD, Chang T, Mmeje O. Expedited Partner Therapy: Combating Record High Sexually Transmitted Infection Rates. *Am J Public Health* 2018;108(10):1325–1327; doi: 10.2105/AJPH.2018.304570.

11. McCool-Myers M, Smith AD, Kottke MJ. Expert Interviews on Multilevel Barriers in Implementing Expedited Partner Therapy for Chlamydia. *J Public Health Manag Pr* 2020;26(6):585–589; doi: 10.1097/phh.0000000000001054.
12. Leblanc NM, St. Vil NM, Bond KT, et al. Dimensions of Sexual Health Conversations among U.S. Black Heterosexual Couples. *Int J Environ Res Public Health* 2022;20(1):588; doi: 10.3390/ijerph20010588.
13. El-Bassel N, Witte SS, Gilbert L, et al. The Efficacy of a Relationship-Based HIV/STD Prevention Program for Heterosexual Couples. *Am J Public Health* 2003;93(6):963–969; doi: 10.2105/AJPH.93.6.963.
14. Lolekha R, Kullerk N, Wolfe MI, et al. Assessment of a couples HIV counseling and testing program for pregnant women and their partners in antenatal care (ANC) in 7 provinces, Thailand. *BMC Int Health Hum Rights* 2014;14(1):39; doi: 10.1186/s12914-014-0039-2.
15. Leblanc NM, Mitchell JW. Providers' perceptions of couples' HIV testing and counseling (CHTC): Perspectives from a U.S. HIV epicenter. *Couple Fam Psychol Res Pract* 2018;7(1):22–33; doi: 10.1037/cfp0000097.
16. Operario D, Gamarel KE, Iwamoto M, et al. Couples-Focused Prevention Program to Reduce HIV Risk Among Transgender Women and Their Primary Male Partners: Feasibility and Promise of the Couples HIV Intervention Program. *AIDS Behav* 2017;21(8):2452–2463; doi: 10.1007/s10461-016-1462-2.
17. El-Bassel N, Gilbert L, Witte S, et al. Couple-Based HIV Prevention in the United States: Advantages, Gaps, and Future Directions. *JAIDS J Acquir Immune Defic Syndr* 2010;55(Supplement 2):S98–S101; doi: 10.1097/QAI.0b013e3181bf407.
18. Burton J, Darbes LA, Operario D. Couples-Focused Behavioral Interventions for Prevention of HIV: Systematic Review of the State of Evidence. *AIDS Behav* 2010;14(1):1–10; doi: 10.1007/s10461-008-9471-4.
19. Witzel TC, Eshun-Wilson I, Jamil MS, et al. Comparing the effects of HIV self-testing to standard HIV testing for key populations: a systematic review and meta-analysis. *BMC Med* 2020;18(1):381; doi: 10.1186/s12916-020-01835-z.
20. Gamarel KE, Chakravarty D, Neilands TB, et al. Composite Risk for HIV: A New Approach Towards Integrating Biomedical and Behavioral Strategies in Couples-Based HIV Prevention Research. *AIDS Behav* 2019;23(1):283–288; doi: 10.1007/s10461-018-2229-8.
21. Starks TJ, Dellucci TV, Gupta S, et al. A Pilot Randomized Trial of Intervention Components Addressing Drug Use in Couples HIV Testing and Counseling (CHTC) with Male Couples. *AIDS Behav* 2019;23(9):2407–2420; doi: 10.1007/s10461-019-02455-2.
22. Wu E, El-Bassel N, Donald McVinney L, et al. Adaptation of a Couple-Based HIV Intervention for Methamphetamine-Involved African American Men who have Sex with Men. *Open AIDS J* 2010;4(1):123–131; doi: 10.2174/1874613601004030123.

23. Jiwatram-Negrón T, El-Bassel N. Systematic Review of Couple-Based HIV Intervention and Prevention Studies: Advantages, Gaps, and Future Directions. *AIDS Behav* 2014;18(10):1864–1887; doi: 10.1007/s10461-014-0827-7.
24. Nabila El-Bassel. Couple-Based HIV Prevention in the United States: Advantages, Gaps, and Future Directions. n.d.
25. Leblanc NM, Mitchell JW. Providers' perceptions of couples' HIV testing and counseling (CHTC): Perspectives from a U.S. HIV epicenter. *Couple Fam Psychol Res Pract* 2018;7(1):22–33; doi: 10.1037/cfp0000097.
26. Coombs NC, Campbell DG, Carangi J. A qualitative study of rural healthcare providers' views of social, cultural, and programmatic barriers to healthcare access. *BMC Health Serv Res* 2022;22(1):438; doi: 10.1186/s12913-022-07829-2.
27. Doherty EJ. Benchmarking Rochester's Poverty: A 2015 Update and Deeper Analysis of Poverty in the City of Rochester. Rochester Area Community Foundation and ACT Rochester; n.d.
28. Tesoriero JM, Patterson W, Daskalakis D, et al. *Notes from the Field: COVID-19 Vaccination Among Persons Living with Diagnosed HIV Infection — New York, October 2021*. *MMWR Morb Mortal Wkly Rep* 2022;71(5):182–184; doi: 10.15585/mmwr.mm7105a4.
29. Ross J. Anti-Black Violence Has Long Been the Most Common American Hate Crime—And We Still Don't Know the Full Extent. *Times Mag* 2022.
30. AIDS Institute NYSD of H. Sexually Transmitted Infections Surveillance Report - New York State. Albany, New York; 2021.
31. Doyle L, McCabe C, Keogh B, et al. An overview of the qualitative descriptive design within nursing research. *J Res Nurs JRN* 2020;25(5):443–455; doi: 10.1177/1744987119880234.
32. Palinkas LA, Horwitz SM, Green CA, et al. Purposeful Sampling for Qualitative Data Collection and Analysis in Mixed Method Implementation Research. *Adm Policy Ment Health* 2015;42(5):533–544; doi: 10.1007/s10488-013-0528-y.
33. Thorne S, Kirkham SR, MacDonald-Emes J. Interpretive description: A noncategorical qualitative alternative for developing nursing knowledge. *Res Nurs Health* 1997;20(2):169–177; doi: 10.1002/(SICI)1098-240X(199704)20:2<169::AID-NUR9>3.0.CO;2-I.
34. Vaismoradi M, Turunen H, Bondas T. Content analysis and thematic analysis: Implications for conducting a qualitative descriptive study. *Nurs Health Sci* 2013;15(3):398–405; doi: 10.1111/nhs.12048.
35. Momplaisir F, Finley E, Wolf S, et al. Implementing Couple's Human Immunodeficiency Virus Testing and Counseling in the Antenatal Care Setting. *Obstet Gynecol* 2020;136(3):582–590; doi: 10.1097/AOG.0000000000003932.

36. Gamarel KE, Darbes LA, Kutsa O, et al. Perspectives from Young Partnered Gay, Bisexual, and Other Men Who Have Sex with Men on the Adaptation of Couples HIV Testing and Counseling (CHTC). *AIDS Behav* 2021;25(3):836–846; doi: 10.1007/s10461-020-03037-3.
37. Palumbo R. Discussing the Effects of Poor Health Literacy on Patients Facing HIV: A Narrative Literature Review. *Int J Health Policy Manag* 2015;4(7):417–430; doi: 10.15171/ijhpm.2015.95.
38. Rucker AJ, Murray A, Gaul Z, et al. The role of patient-provider sexual health communication in understanding the uptake of HIV prevention services among Black men who have sex with men. *Cult Health Sex* 2018;20(7):761–771; doi: 10.1080/13691058.2017.1375156.
39. Nachega JB, Morroni C, Zuniga JM, et al. HIV treatment adherence, patient health literacy, and health care provider-patient communication: results from the 2010 AIDS Treatment for Life International Survey. *J Int Assoc Physicians AIDS Care Chic Ill* 2002 2012;11(2):128–133; doi: 10.1177/1545109712437244.
40. Budhwani H, Gakumo CA, Yigit I, et al. Patient Health Literacy and Communication with Providers Among Women Living with HIV: A Mixed Methods Study. *AIDS Behav* 2022;26(5):1422–1430; doi: 10.1007/s10461-021-03496-2.
41. Dawson-Rose C, Cuca YP, Webel AR, et al. Building Trust and Relationships Between Patients and Providers: An Essential Complement to Health Literacy in HIV Care. *J Assoc Nurses AIDS Care JANAC* 2016;27(5):574–584; doi: 10.1016/j.jana.2016.03.001.
42. Kordovski VM, Woods SP, Avci G, et al. Is the Newest Vital Sign a Useful Measure of Health Literacy in HIV Disease? *J Int Assoc Provid AIDS Care* 2017;16(6):595–602; doi: 10.1177/2325957417729753.
43. Mgbako O, Conard R, Mellins CA, et al. A Systematic Review of Factors Critical for HIV Health Literacy, ART Adherence and Retention in Care in the U.S. for Racial and Ethnic Minorities. *AIDS Behav* 2022;26(11):3480–3493; doi: 10.1007/s10461-022-03680-y.
44. Kielmann K, Deshmukh D, Deshpande S, et al. Managing uncertainty around HIV/AIDS in an urban setting: Private medical providers and their patients in Pune, India. *Soc Sci Med* 2005;61(7):1540–1550; doi: 10.1016/j.socscimed.2005.02.008.
45. Efua Sackey M, Markey K, Grealish A. Healthcare professional’s promotional strategies in improving Human papillomavirus (HPV) vaccination uptake in adolescents: A systematic review. *Vaccine* 2022;40(19):2656–2666; doi: 10.1016/j.vaccine.2022.03.054.
46. Sullivan PS, White D, Rosenberg ES, et al. Safety and Acceptability of Couples HIV Testing and Counseling for US Men Who Have Sex with Men: A Randomized Prevention Study. *J Int Assoc Provid AIDS Care JIAPAC* 2014;13(2):135–144; doi: 10.1177/2325957413500534.
47. Sullivan TP. The intersection of intimate partner violence and HIV: detection, disclosure, discussion, and implications for treatment adherence. *Top Antivir Med* 2019;27(2):84–87.
48. Belus JM, Msimango LI, van Heerden A, et al. Barriers, Facilitators, and Strategies to Improve Participation of a Couple-Based Intervention to Address Women’s Antiretroviral Therapy Adherence in KwaZulu-Natal, South Africa. *Int J Behav Med* 2023; doi: 10.1007/s12529-023-10160-7.

49. Pérez-Jiménez D, Seal DW, Serrano-García I. Barriers and facilitators of HIV prevention with heterosexual Latino couples: Beliefs of four stakeholder groups. *Cultur Divers Ethnic Minor Psychol* 2009;15(1):11–17; doi: 10.1037/a0013872.
50. Stockton MA, Giger K, Nyblade L. A scoping review of the role of HIV-related stigma and discrimination in noncommunicable disease care. Uthman O. ed. *PLOS ONE* 2018;13(6):e0199602; doi: 10.1371/journal.pone.0199602.
51. Nakku-Joloba E, Pisarski EE, Wyatt MA, et al. Beyond HIV prevention: everyday life priorities and demand for Pr EP among Ugandan HIV serodiscordant couples. *J Int AIDS Soc* 2019;22(1); doi: 10.1002/jia2.25225.
52. Smith P, Buttenheim A, Schmucker L, et al. Undetectable = Untransmittable (U = U) Messaging Increases Uptake of HIV Testing Among Men: Results from a Pilot Cluster Randomized Trial. *AIDS Behav* 2021;25(10):3128–3136; doi: 10.1007/s10461-021-03284-y.
53. Przybyla S, LaValley S, St Vil N. Health Care Provider Perspectives on Pre-exposure Prophylaxis: A Qualitative Study. *J Assoc Nurses AIDS Care* 2019;30(6):630–638; doi: 10.1097/jnc.0000000000000073.
54. McMahon JM, Pouget ER, Tortu S, et al. Couple-Based HIV Counseling and Testing: a Risk Reduction Intervention for US Drug-Involved Women and Their Primary Male Partners. *Prev Sci* 2015;16(2):341–351; doi: 10.1007/s11121-014-0540-9.
